# Supplementary material
Source: PubMed Central journal article supplement (PMC2725605)

## Legend to Supplemental Figure

### Supplemental Figure 1

#### **Western blot analysis of YpTOP-D117N induction with arabinose in the presence of iron chelator 2,2'-dipyridyl**

BW117N was cultured to OD<sub>600</sub>=0.4 before the addition of the indicated concentration of arabinose and/or 0.5 mM 2,2'-dipyridyl. Cells were collected for analysis after 3 h. After suspension in SDS gel sample buffer, the samples were boiled for 5 min before electrophoresis. Western blot analysis with mouse monoclonal antibodies against *E. coli* topoisomerase I which also recognizes the highly homologous YpTOP. Y: recombinant YpTOP-D117N. Y\*: partially degraded recombinant YpTOP-D117N. E: endogenous *E. coli* topoisomerase I protein. Recombinant YpTOP has a higher molecular weight because of the presence of the N-terminus thioredoxin tag which does not affect the topoisomerase activity (4). Part of the signal from the anti-*E. coli* topoisomerase I antibodies at the lower position seen in the presence of arabinose was due to the presence of partially degraded recombinant YpTOP-D117N.

Figure S1

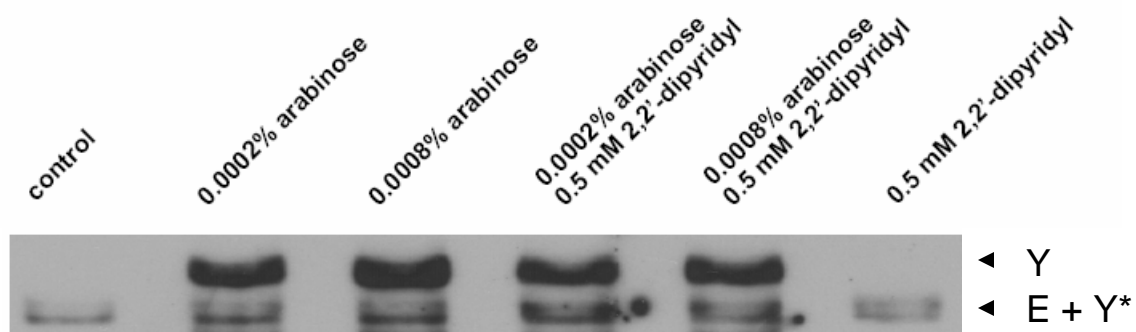

Supplement: supp_191_16_5315__1.pdf [file supp_191_16_5315__1.pdf]
